# Supplementary material for: Prediction of Prognosis in Patients with Hepatocellular Carcinoma Based on Molecular Subtypes of Immune Genes
Source: Hindawi journal article supplement (doi:10.1155/2022/2746156), 2022-06-28
Supplement: f1 [file 2746156.f1.pdf]

Symbol

AZGP1

B2M

CALR

CANX

CD1A

CD1B

CD1C

CD1D

CD1E

CD4

CD8A

CD8B

CD74

CREB1

CTSB

CTSE

CTSL

CTSS

FCER1G

FCGRT

PDIA3

HFE

HLA-A

HLA-B

HLA-C

HLA-DMA

HLA-DMB

HLA-DOA

HLA-DOB

HLA-DPA1

HLA-DPB1

HLA-DQA1

HLA-DQA2

HLA-DQB1

HLA-DRA

HLA-DRB1

HLA-DRB3

HLA-DRB4

HLA-DRB5

HLA-E

HLA-F

HLA-G

HLA-H

MR1

HSPA1A

HSPA1B

HSPA1L  
HSPA2  
HSPA4  
HSPA5  
HSPA6  
HSPA8  
HSP90AA1  
HSP90AB1  
ICAM1  
IFNA1  
IFNA2  
IFNA4  
IFNA5  
IFNA6  
IFNA7  
IFNA8  
IFNA10  
IFNA13  
IFNA14  
IFNA16  
IFNA17  
IFNA21  
IFNG  
KIR2DL1  
KIR2DL2  
KIR2DL3  
KIR2DL4  
KIR2DS1  
KIR2DS3  
KIR2DS4  
KIR2DS5  
KIR3DL1  
KIR3DL2  
KLRC1  
KLRC2  
KLRC3  
KLRD1  
LTA  
CIITA  
MICA  
MICB  
NFYA  
NFYB  
NFYC  
LGMN  
PSMB8  
PSMC1

PSMC2  
PSMC3  
PSMC4  
PSMC5  
PSMC6  
PSMD1  
PSMD2  
PSMD3  
PSMD4  
PSMD5  
PSMD7  
PSMD8  
PSMD10  
PSMD11  
PSMD13  
PSME1  
PSME2  
RELB  
RFX5  
RFXAP  
SLC10A2  
TAP1  
TAP2  
TAPBP  
THBS1  
SEM1  
KLRC4  
AP3B1  
RFXANK  
PSMD6  
PSME3  
PSMD14  
CLEC4M  
IFI30  
PROCR  
ADRM1  
ECPAS  
TRPC4AP  
CD209  
UBXN1  
ERAP1  
TAPBPL  
KIR2DL5A  
ERAP2  
ULBP3  
ULBP2  
ULBP1

KIR3DL3  
RAET1E  
RAET1L  
UBR1  
RAET1G  
PDIA2  
HAMP  
PI3  
CAMP  
DEFB4A  
PPBP  
REG3G  
CXCL14  
CXCL16  
SLPI  
CXCL8  
CXCL10  
CXCL9  
CXCL5  
CXCL11  
CXCL6  
CXCL1  
CXCL12  
CXCL13  
CXCL2  
PF4  
XCL1  
CXCL3  
DEFB103B  
CCL13  
CCL1  
DEFB1  
CCL8  
ELANE  
DEFB103A  
DEFA3  
DEFA1  
TMSB10  
DEFA6  
DEFA5  
DEFA4  
LCN2  
LCN1  
COLEC10  
BPI  
S100A9  
S100A8

DCD  
LCN6  
S100A12  
HTN3  
LCN8  
DEFA1B  
CCR10  
CELA1  
DEFB106A  
PENK  
BPIFC  
MMP12  
BPIFB6  
LEAP2  
SFTPD  
LCN9  
BPIFB2  
PTGDS  
TMSB4X  
PGLYRP1  
ZC3HAV1  
TMSB15A  
S100B  
S100A13  
S100A6  
DEFB119  
DEFB107A  
DEFB105A  
SERPIND1  
DEFB129  
DEFB127  
S100P  
S100A7  
DEFB104A  
DEFB126  
DEFB106B  
DEFB104B  
DEFB107B  
PGLYRP3  
PGLYRP2  
S100A10  
S100A2  
DEFB125  
DEFB123  
DEFB105B  
DEFB132  
BPIFB3

LCN12  
PGLYRP4  
S100A11  
S100A5  
S100A3  
S100A1  
DEFB128  
DEFB108B  
HTN1  
LMBR1L  
S100A7A  
DEFB118  
COLEC12  
TMSB4Y  
DEFB131A  
DEFB134  
DEFB130A  
DEFB124  
DEFB121  
DEFB116  
DEFB115  
DEFB114  
DEFB113  
DEFB112  
DEFB110  
TMSB15B  
DEFB133  
S100Z  
MAVS  
TMSB4XP8  
S100A14  
LCN10  
S100A16  
DEFB136  
DEFB135  
DEFB117  
ZC3HAV1L  
S100A7L2  
MBL3P  
DEFB4B  
BPIFB4  
IFNAR1  
AZU1  
DEFB131B  
DEFA1A3  
LCN1P1  
S100G

DEFA7P  
DEFB130B  
DEFB108F  
DEFB131C  
TCHHL1  
TINAGL1  
IFNGR1  
SLC22A17  
WFIKKN1  
WFDC2  
IL6  
UMODL1  
TGFB1  
PF4V1  
MMP9  
ANOS1  
TLR4  
SPAG11B  
A2M  
NFKB1  
APOBEC3G  
FABP6  
NOD2  
MBL2  
SFTPA1  
RBP1  
TLR2  
SLC40A1  
PLAU  
IL1B  
PAEP  
HJV  
MUC5AC  
OBP2A  
PLTP  
MX1  
DDX58  
IFNL1  
IRF3  
SFTPA2  
LPA  
LBP  
RBP4  
NOX4  
LTF  
IFNB1  
RBP5

FABP7  
FABP5  
FABP3  
FABP2  
FABP4  
R3HDML  
BPIFA3  
BPIFB1  
OASL  
CRABP2  
CRABP1  
RBP7  
DUOX1  
OBP2B  
RBP2  
LCN15  
CETP  
FABP12  
FABP9  
BPIFA1  
LCNL1  
C8G  
SPAG11A  
PI15  
NOX1  
PMP2  
APOD  
ORM2  
ORM1  
TNF  
CTSG  
PRTN3  
MAPK1  
PML  
AEN  
CYBB  
BPIFA2  
ISG20  
BCL3  
ISG20L2  
NOX5  
NOX3  
DUOX2  
TLR3  
TFRC  
IFIH1  
LRP1



TRIM5  
IDO1  
GDF15  
NEDD4  
ADIPOQ  
STAT3  
STAT1  
IFNL2  
SOCS3  
SEMG1  
TNFSF10  
CCL20  
SOCS1  
RNASEL  
IRF1  
IL15  
APOBEC3F  
PLAAT4  
CHIT1  
CD40  
TLR7  
PPIA  
ZYG  
NLRX1  
PGC  
VEGFA  
IKBKE  
ISG15  
DHX58  
TNFAIP3  
TFR2  
FCN2  
MUC4  
F2R  
ELN  
IL27  
MAPT  
LYZ  
CCL5  
LEP  
CYLD  
KLKB1  
CST4  
CSRP1  
MAPK14  
JUN  
ITGAV

IRF5  
CCR6  
IL12B  
TLR8  
GNLY  
CD81  
EIF2AK2  
APOM  
CACYPB  
NOD1  
MAPK8  
MAPK3  
BST2  
BPHL  
PLA2G2A  
GRN  
NEWENTRY  
PDGFRA  
GNAI1  
WNT5A  
FURIN  
ADAR  
TYK2  
NOS2  
TRAF3  
TPT1  
TPM2  
NEO1  
AHNAK  
TLR1  
TK2  
PRDX2  
MX2  
FGF2  
FGA  
TCF7L2  
F2RL1  
TKFC  
MSR1  
NFKBIZ  
LMBR1  
EPPIN  
SRC  
MPO  
ELAVL1  
ROBO3  
SP1

SOD1  
PDF  
DLL4  
ECD  
SLC11A1  
DMBT1  
STING1  
SKIV2L  
SEMG2  
DES  
DCK  
DAXX  
TNFRSF10A  
TNFRSF10B  
EED  
CCL4  
LIMS1  
LALBA  
APOBEC3H  
TMPRSS6  
SPINK5  
MARCO  
BECN1  
TNFSF11  
KNG1  
CSK  
KLRK1  
KCNH2  
JUND  
JAK1  
CLDN4  
CCL28  
RNASE3  
RN7SL1  
IRF7  
IREB2  
ILK  
IL18  
IL17A  
LTB4R  
APOBEC3A  
MASP2  
TRIM27  
RELA  
IL7R  
IL1A  
PTX3

IFNAR2  
IFN1@  
SYTL1  
APOBEC3C  
DDX17  
PTGS2  
HTR1A  
SEPTIN7  
CD40LG  
CD14  
MASP1  
PROC  
MAP2K2  
MAP2K1  
HRG  
NDRG1  
IRF9  
TRIM22  
LANCL1  
PPP4C  
HMOX1  
HMGB1  
RNASE7  
ABCC4  
HGF  
HDAC1  
IFNLR1  
PLSCR1  
BACH2  
TANK  
PIK3CG  
ARRB1  
RSAD2  
STAB2  
TBK1  
PDYN  
PDGFRB  
PDCD1  
PCSK2  
PCSK1  
ARG2  
AQP9  
FASLG  
APOH  
BIRC5  
ANXA6  
IL22

VTN  
VIM  
VCAM1  
PRDX1  
GFAP  
GBP2  
ALB  
SLC29A3  
OAS1  
AGER  
UNC93B1  
TNFSF4  
NOS1  
ACTG1  
ACTA1  
ACO1  
SERPINA3  
CXCR1  
CCL15  
CCL14  
CCL16  
CCL19  
CCL18  
CCL17  
CCL26  
CCL22  
CCR3  
CCL4L1  
ACKR2  
CCR7  
CCL27  
CCR8  
ACKR4  
CCL2  
CCL21  
CCL7  
CCL3  
CCL11  
CCR5  
CCL23  
CCL25  
CCL3L3  
CCL4L2  
CCL3L1  
CCR1  
CCL24  
XCL2

CXCR4  
CXCR6  
CCR4  
TAF5  
TAF3  
TAF4  
TAF1  
TAF2  
CCL15-CCL14  
PTK2B  
IL4  
CDH1  
LTBP1  
IL13  
IL10  
IL2  
PPARG  
FGR  
MIF  
CRP  
JAK2  
PTK2  
PTGDR  
CD86  
HCK  
VDR  
OLR1  
GRK2  
TXK  
RNASE2  
CD79A  
CD79B  
LYN  
SYK  
BTK  
BLNK  
VAV3  
VAV1  
VAV2  
RAC1  
RAC2  
RAC3  
PPP3CA  
PPP3CB  
PPP3CC  
CHP1  
PPP3R1

PPP3R2  
CHP2  
NFAT5  
NFATC1  
NFATC2  
NFATC3  
NFATC4  
HRAS  
KRAS  
NRAS  
FOS  
CARD11  
BCL10  
MALT1  
CHUK  
IKBKB  
IKBKG  
NFKBIA  
NFKBIB  
NFKBIE  
CD19  
CR2  
PIK3R5  
PIK3R1  
PIK3R2  
PIK3R3  
PIK3CA  
PIK3CB  
PIK3CD  
AKT3  
AKT1  
AKT2  
GSK3B  
INPP5D  
CD22  
CD72  
PTPN6  
LILRB3  
FCGR2B  
RASGRP3  
PLCG2  
PRKCB  
IFITM1  
IGH  
IGHA1  
IGHA2  
IGHD

IGHD1-1  
IGHD1-14  
IGHD1-20  
IGHD1-26  
IGHD1-7  
IGHD2-15  
IGHD2-2  
IGHD2-21  
IGHD2-8  
IGHD3-10  
IGHD3-16  
IGHD3-22  
IGHD3-3  
IGHD3-9  
IGHD4-11  
IGHD4-17  
IGHD4-23  
IGHD4-4  
IGHD5-12  
IGHD5-18  
IGHD5-24  
IGHD5-5  
IGHD6-13  
IGHD6-19  
IGHD6-25  
IGHD6-6  
IGHD7-27  
IGHE  
IGHG1  
IGHG2  
IGHG3  
IGHG4  
IGHJ1  
IGHJ2  
IGHJ3  
IGHJ4  
IGHJ5  
IGHJ6  
IGHM  
IGHV1-18  
IGHV1-2  
IGHV1-24  
IGHV1-3  
IGHV1-45  
IGHV1-46  
IGHV1-58  
IGHV1-69



IGHV1-8  
IGHV1-38-4  
IGHV1-69-2  
IGHV2-26  
IGHV2-5  
IGHV2-70  
IGHV3-11  
IGHV3-13  
IGHV3-15  
IGHV3-16  
IGHV3-20  
IGHV3-21  
IGHV3-23  
IGHV3-30  
IGHV3-30-3  
IGHV3-30-5  
IGHV3-33  
IGHV3-35  
IGHV3-38  
IGHV3-43  
IGHV3-48  
IGHV3-49  
IGHV3-53  
IGHV3-64  
IGHV3-66  
IGHV3-7  
IGHV3-72  
IGHV3-73  
IGHV3-74  
IGHV3-9  
IGHV3-38-3  
IGHV3-69-1  
IGHV4-28  
IGHV4-30-1  
IGHV4-30-2  
IGHV4-30-4  
IGHV4-31  
IGHV4-34  
IGHV4-39  
IGHV4-4  
IGHV4-59  
IGHV4-61  
IGHV4-38-2  
IGHV5-51  
IGHV5-10-1  
IGHV6-1  
IGHV7-4-1

IGHV7-81  
IGK  
IGKC  
IGKDEL  
IGKJ  
IGKJ1  
IGKJ2  
IGKJ3  
IGKJ4  
IGKJ5  
IGKV@  
IGKV1-12  
IGKV1-13  
IGKV1-16  
IGKV1-17  
IGKV1-27  
IGKV1-33  
IGKV1-37  
IGKV1-39  
IGKV1-5  
IGKV1-6  
IGKV1-8  
IGKV1-9  
IGKV1D-12  
IGKV1D-13  
IGKV1D-16  
IGKV1D-17  
IGKV1D-33  
IGKV1D-37  
IGKV1D-39  
IGKV1D-42  
IGKV1D-43  
IGKV1D-8  
IGKV2-24  
IGKV2-28  
IGKV2-30  
IGKV2-40  
IGKV2D-24  
IGKV2D-28  
IGKV2D-29  
IGKV2D-30  
IGKV2D-40  
IGKV3-11  
IGKV3-15  
IGKV3-20  
IGKV3-7  
IGKV3D-11

IGKV3D-15  
IGKV3D-20  
IGKV3D-7  
IGKV4-1  
IGKV5-2  
IGKV6-21  
IGKV6D-21  
IGKV6D-41  
IGL  
IGLC1  
IGLC2  
IGLC3  
IGLC6  
IGLC7  
IGLJ  
IGLJ1  
IGLJ2  
IGLJ3  
IGLJ4  
IGLJ5  
IGLJ6  
IGLJ7  
IGLV@  
IGLV1-36  
IGLV1-40  
IGLV1-44  
IGLV1-47  
IGLV1-50  
IGLV1-51  
IGLV10-54  
IGLV11-55  
IGLV2-11  
IGLV2-14  
IGLV2-18  
IGLV2-23  
IGLV2-33  
IGLV2-8  
IGLV3-1  
IGLV3-10  
IGLV3-12  
IGLV3-16  
IGLV3-19  
IGLV3-21  
IGLV3-22  
IGLV3-25  
IGLV3-27  
IGLV3-32

IGLV3-9  
IGLV4-3  
IGLV4-60  
IGLV4-69  
IGLV5-37  
IGLV5-39  
IGLV5-45  
IGLV5-48  
IGLV5-52  
IGLV6-57  
IGLV7-43  
IGLV7-46  
IGLV8-61  
IGLV9-49  
C3  
C5  
CCL3P1  
CKLF  
CMA1  
CX3CL1  
CXCL17  
CCN1  
EDN1  
EDN2  
EDN3  
FGF10  
LECT2  
PPBPP1  
PROK2  
SAA1  
SAA2  
SBDS  
SEMA3A  
SEMA3B  
SEMA3C  
SEMA3D  
SEMA3E  
SEMA3F  
SEMA3G  
SEMA4A  
SEMA4B  
SEMA4C  
SEMA4D  
SEMA4F  
SEMA4G  
SEMA5A  
SEMA5B

SEMA6A  
SEMA6B  
SEMA6C  
SEMA6D  
SEMA7A  
SLIT1  
SLIT2  
TNC  
TYMP  
C5AR1  
CCR9  
CCRL2  
CMKLR1  
CX3CR1  
CXCR3  
CXCR5  
ACKR3  
CYSLTR1  
CYSLTR2  
ACKR1  
EDNRA  
EDNRB  
FPR1  
FPR2  
GPR17  
GPR32  
GPR33  
PTGDR2  
C5AR2  
CXCR2  
LTB4R2  
PLAUR  
PLXNA1  
PLXNA2  
PLXNA3  
PLXNA4  
PLXNB1  
PLXNB2  
PLXNB3  
PLXNC1  
PLXND1  
PTAFR  
ROBO1  
ROBO2  
RXFP3  
XCR1  
ADM

ADM2  
AGRP  
AGT  
AMBN  
AMELX  
AMH  
ANGPTL5  
ANGPTL7  
APLN  
AREG  
MANF  
CDNF  
ARTN  
AVP  
BDNF  
BMP1  
BMP10  
BMP15  
BMP2  
BMP3  
BMP4  
BMP5  
BMP6  
BMP7  
BMP8A  
BMP8B  
BTC  
MYDGF  
CALCA  
CALCB  
CAT  
CCK  
CD320  
CD70  
ADA2  
CER1  
CGA  
CGB3  
CGB1  
CGB2  
CGB5  
CGB7  
CGB8  
CHGA  
CHGB  
CLCF1  
CLEC11A

CMTM1  
CMTM2  
CMTM3  
CMTM4  
CMTM5  
CMTM6  
CMTM7  
CMTM8  
CNTF  
CORT  
CRH  
CSF1  
CSF2  
CSF3  
CSH1  
CSH2  
CSHL1  
CSPG5  
CTF1  
CCN2  
DKK1  
EBI3  
EGF  
EPGN  
EPO  
EREG  
ESM1  
FAM3B  
FAM3C  
FAM3D  
FGF1  
FGF11  
FGF12  
FGF13  
FGF14  
FGF16  
FGF17  
FGF18  
FGF19  
FGF20  
FGF21  
FGF22  
FGF23  
FGF3  
FGF4  
FGF5  
FGF6

FGF7  
FGF8  
FGF9  
VEGFD  
FIGNL2  
FLT3LG  
FSHB  
GAL  
GALP  
GAST  
GCG  
GDF1  
GDF10  
GDF11  
GDF2  
GDF3  
GDF5  
GDF6  
GDF7  
GDF9  
GDNF  
GH1  
GH2  
GHRH  
GHRL  
GIP  
GKN1  
GMFB  
GMFG  
GNRH1  
GNRH2  
GPHA2  
GPHB5  
GPI  
GREM1  
GREM2  
GRP  
GUCA2A  
HBEGF  
HDGF  
HDGFL3  
IAPP  
IFNE  
IFNK  
IFNW1  
IGF1  
IGF2



IL11  
IL12A  
IL16  
IL17B  
IL17C  
IL17D  
IL17F  
IL19  
IL1F10  
IL36RN  
IL36A  
IL37  
IL36B  
IL36G  
IL1RN  
IL20  
IL21  
IL23A  
IL24  
IL25  
IL26  
IFNL3  
IL3  
IL31  
IL32  
IL33  
IL34  
IL5  
IL6ST  
IL7  
IL9  
INHA  
INHBA  
INHBB  
INHBC  
INHBE  
INS  
INS-IGF2  
INSL3  
INSL4  
INSL5  
INSL6  
JAG1  
JAG2  
FGF7P6  
FGF7P3  
KITLG

KL  
LACRT  
LEFTY1  
LEFTY2  
LHB  
LIF  
LRSAM1  
LTB  
LTBP2  
LTBP3  
LTBP4  
MDK  
MIA  
MLN  
MSTN  
NAMPT  
NDP  
NENF  
NGF  
NMB  
NODAL  
CCN3  
NPFF  
NPPA  
NPPB  
NPPC  
NPY  
NRG1  
NRG2  
NRG3  
NRG4  
NRTN  
NTF3  
NTF4  
NTS  
NUDT6  
OGN  
OSGIN1  
OSM  
OSTN  
OXT  
ENDOU  
PDGFA  
PDGFB  
PDGFC  
PDGFD  
PDGFRL

PGF  
PMCH  
PNOC  
POMC  
PPBPP2  
PPY  
PRL  
PRLH  
PROK1  
PSPN  
PTH  
PTH2  
PTHLH  
PTN  
PYY  
QRFP  
RABEP1  
RABEP2  
REG1A  
RETN  
RETNLB  
RLN1  
RLN2  
RLN3  
SCG2  
SCGB3A1  
SCT  
AIMP1  
SECTM1  
SLURP1  
SPP1  
SST  
STC1  
STC2  
TAC1  
TDGF1  
TDGF1P3  
TG  
TGFA  
TGFB2  
TGFB3  
THPO  
TNFRSF11B  
TNFSF12  
TNFSF13  
TNFSF13B  
TNFSF14

TNFSF15  
TNFSF18  
TNFSF8  
TNFSF9  
TOR2A  
TRH  
TSHB  
TSLP  
TXLNA  
UCN  
UCN2  
UCN3  
UTS2  
UTS2B  
VEGFB  
VEGFC  
VGF  
VIP  
ACVR1B  
ACVR1C  
ACVR2A  
ACVR2B  
ACVRL1  
ADCYAP1R1  
ADIPOR1  
ADIPOR2  
ADRB1  
ADRB2  
AGTR1  
AGTR2  
AMHR2  
ANGPT1  
ANGPT4  
ANGPTL1  
ANGPTL2  
ANGPTL3  
ANGPTL4  
ANGPTL6  
APLNR  
AR  
AVPR1A  
AVPR1B  
AVPR2  
BMPR1A  
BMPR1B  
BMPR2  
BRD8

C3AR1  
CALCR  
CALCRL  
CNTFR  
CRHR1  
CRHR2  
CRIM1  
CRLF1  
CRLF2  
CRLF3  
CSF1R  
CSF2RA  
CSF2RB  
CSF3R  
EGFR  
ENG  
EPOR  
ESR1  
ESR2  
ESRRA  
ESRRB  
ESRRG  
FGFR1  
FGFR2  
FGFR3  
FGFR4  
FGFRL1  
FLT1  
FLT3  
FLT4  
FSHR  
GALR2  
GALR3  
GCGR  
GHR  
GHRHR  
GHSR  
GIPR  
GLP1R  
GLP2R  
GNRHR  
GPER1  
HNF4A  
HNF4G  
HTR3A  
HTR3B  
HTR3C

HTR3D  
HTR3E  
IFNGR2  
IGF1R  
IGF2R  
IL10RA  
IL10RB  
IL11RA  
IL12RB1  
IL12RB2  
IL13RA1  
IL13RA2  
IL15RA  
IL2RB  
IL17RA  
IL17RB  
IL17RC  
IL17RD  
IL17RE  
IL18R1  
IL18RAP  
IL1R1  
IL1R2  
IL1RAP  
IL1RL1  
IL1RL2  
IL20RA  
IL20RB  
IL21R  
IL22RA1  
IL22RA2  
IL23R  
IL27RA  
IL2RA  
IL2RG  
IL31RA  
IL3RA  
IL4R  
IL5RA  
IL6R  
IL9R  
INSR  
KDR  
LEPR  
LGR4  
LGR5  
LGR6

LHCGR  
LIFR  
LTBR  
MC1R  
MC2R  
MC3R  
MC4R  
MCHR1  
MCHR2  
MET  
MLNR  
MPL  
MTNR1A  
MTNR1B  
NGFR  
NMBR  
NPR1  
NPR3  
NROB1  
NROB2  
NR1D1  
NR1D2  
NR1H2  
NR1H3  
NR1H4  
NR1I2  
NR1I3  
NR2C1  
NR2C2  
NR2E1  
NR2E3  
NR2F1  
NR2F2  
NR2F6  
NR3C1  
NR3C2  
NR4A1  
NR4A2  
NR4A3  
NR5A1  
NR5A2  
NR6A1  
NRP1  
NRP2  
OGFR  
OPRD1  
OPRK1

OPRL1  
OPRM1  
OSMR  
OXTR  
PGR  
PGRMC2  
PPARA  
PPARD  
PRLHR  
PRLR  
PTGER1  
PTGER2  
PTGER3  
PTGER4  
PTGFR  
PTH1R  
PTH2R  
RARA  
RARB  
RARG  
RORA  
RORB  
RORC  
RXFP1  
RXFP2  
RXRA  
RXRB  
RXRG  
S1PR1  
S1PR2  
SCTR  
SDC1  
SDC2  
SDC3  
SDC4  
SORT1  
SSTR1  
SSTR2  
SSTR5  
ST2  
TACR1  
TEK  
TGFBR1  
TGFBR2  
TGFBR3  
THRA  
THRB



TIE1  
TNFRSF10C  
TNFRSF10D  
TNFRSF11A  
TNFRSF12A  
TNFRSF13B  
TNFRSF13C  
TNFRSF14  
TNFRSF17  
TNFRSF18  
TNFRSF19  
TNFRSF1A  
TNFRSF1B  
TNFRSF21  
TNFRSF25  
TNFRSF4  
TNFRSF6B  
TNFRSF8  
TNFRSF9  
TRHR  
TSHR  
TUBB3  
VIPR1  
VIPR2  
PTPN11  
ICAM2  
ITGAL  
ITGB2  
PAK1  
NCR2  
TYROBP  
LCK  
FCGR3A  
FCGR3B  
NCR1  
NCR3  
CD247  
ZAP70  
LCP2  
LAT  
PLCG1  
SH3BP2  
FYN  
SHC2  
SHC4  
SHC3  
SHC1

GRB2  
SOS1  
SOS2  
ARAF  
BRAF  
RAF1  
HCST  
CD48  
CD244  
PRKCA  
PRKCG  
SH2D1B  
SH2D1A  
FAS  
GZMB  
PRF1  
CASP3  
BID  
CD3D  
CD3E  
CD3G  
PTPRC  
ITK  
TEC  
NCK1  
NCK2  
GRAP2  
PAK2  
PAK3  
PAK4  
PAK6  
PAK5  
RHOA  
CDC42  
CD28  
ICOS  
MAP3K8  
MAP3K14  
CTLA4  
CBLC  
CBL  
CBLB  
CDK4  
RASGRP1  
PDK1  
PRKCQ  
TRAC

TRAJ1  
TRAJ2  
TRAJ3  
TRAJ4  
TRAJ5  
TRAJ6  
TRAJ7  
TRAJ8  
TRAJ9  
TRAJ10  
TRAJ11  
TRAJ12  
TRAJ13  
TRAJ14  
TRAJ15  
TRAJ16  
TRAJ17  
TRAJ18  
TRAJ19  
TRAJ20  
TRAJ21  
TRAJ22  
TRAJ23  
TRAJ24  
TRAJ25  
TRAJ26  
TRAJ27  
TRAJ28  
TRAJ29  
TRAJ30  
TRAJ31  
TRAJ32  
TRAJ33  
TRAJ34  
TRAJ35  
TRAJ36  
TRAJ37  
TRAJ38  
TRAJ39  
TRAJ40  
TRAJ41  
TRAJ42  
TRAJ43  
TRAJ44  
TRAJ45  
TRAJ46  
TRAJ47

TRAJ48  
TRAJ49  
TRAJ50  
TRAJ52  
TRAJ53  
TRAJ54  
TRAJ56  
TRAJ57  
TRAJ58  
TRAJ59  
TRAJ61  
TRAV1-1  
TRAV1-2  
TRAV2  
TRAV3  
TRAV4  
TRAV5  
TRAV7  
TRAV8-1  
TRAV8-2  
TRAV8-3  
TRAV8-4  
TRAV8-6  
TRAV8-7  
TRAV9-1  
TRAV9-2  
TRAV10  
TRAV12-1  
TRAV12-2  
TRAV12-3  
TRAV13-1  
TRAV13-2  
TRAV14DV4  
TRAV16  
TRAV17  
TRAV18  
TRAV19  
TRAV20  
TRAV21  
TRAV22  
TRAV23DV6  
TRAV24  
TRAV25  
TRAV26-1  
TRAV26-2  
TRAV27  
TRAV29DV5

TRAV30  
TRAV34  
TRAV35  
TRAV36DV7  
TRAV38-1  
TRAV38-2DV8  
TRAV39  
TRAV40  
TRAV41  
TRBC1  
TRBC2  
TRBD1  
TRBD2  
TRBJ1-1  
TRBJ1-2  
TRBJ1-3  
TRBJ1-4  
TRBJ1-5  
TRBJ1-6  
TRBJ2-1  
TRBJ2-2  
TRBJ2-3  
TRBJ2-4  
TRBJ2-5  
TRBJ2-6  
TRBJ2-7  
TRBV2  
TRBV3-1  
TRBV4-1  
TRBV4-2  
TRBV4-3  
TRBV5-1  
TRBV5-4  
TRBV5-5  
TRBV5-6  
TRBV5-7  
TRBV5-8  
TRBV6-1  
TRBV6-2  
TRBV6-3  
TRBV6-4  
TRBV6-5  
TRBV6-6  
TRBV6-7  
TRBV6-8  
TRBV6-9  
TRBV7-2

TRBV7-3  
TRBV7-4  
TRBV7-6  
TRBV7-7  
TRBV7-8  
TRBV7-9  
TRBV9  
TRBV10-1  
TRBV10-2  
TRBV10-3  
TRBV11-1  
TRBV11-2  
TRBV11-3  
TRBV12-3  
TRBV12-4  
TRBV12-5  
TRBV13  
TRBV14  
TRBV15  
TRBV16  
TRBV17  
TRBV18  
TRBV19  
TRBV20-1  
TRBV24-1  
TRBV25-1  
TRBV27  
TRBV28  
TRBV29-1  
TRBV30  
TRDC  
TRDD1  
TRDD2  
TRDD3  
TRDJ1  
TRDJ2  
TRDJ3  
TRDJ4  
TRDV1  
TRDV2  
TRDV3  
TRGV9  
TRGV8  
TRGV5  
TRGV4  
TRGV3  
TRGV2

TRGJP2  
TRGJP1  
TRGJP  
TRGJ2  
TRGJ1  
TRGC2  
TRGC1  
TRAV6
