# Supplementary material for: Prediction of Prognosis in Patients with Hepatocellular Carcinoma Based on Molecular Subtypes of Immune Genes
Source: Hindawi journal article supplement (doi:10.1155/2022/2746156), 2022-06-28
Supplement: f2 [file 2746156.f2.pdf]

| id      | HR       | HR.95L   | HR.95H   | pvalue   |
|---------|----------|----------|----------|----------|
| NROB1   | 1.107711 | 1.062523 | 1.15482  | 1.48E-06 |
| EPO     | 1.141248 | 1.075675 | 1.210817 | 1.21E-05 |
| PAEP    | 1.074152 | 1.034909 | 1.114883 | 0.000165 |
| FABP6   | 1.08826  | 1.037017 | 1.142034 | 0.000588 |
| SPP1    | 1.110571 | 1.045176 | 1.180058 | 0.000707 |
| S100A2  | 1.162541 | 1.064477 | 1.269639 | 0.000809 |
| OGN     | 0.907371 | 0.855712 | 0.962149 | 0.001153 |
| FGF9    | 1.114883 | 1.036275 | 1.199453 | 0.003555 |
| AQP9    | 0.900643 | 0.838087 | 0.967868 | 0.004383 |
| NPPB    | 1.071858 | 1.019151 | 1.12729  | 0.00699  |
| EGF     | 1.073549 | 1.01958  | 1.130374 | 0.007001 |
| PGLYRP4 | 1.093529 | 1.023698 | 1.168124 | 0.007916 |
