# Supplementary material for: Prediction of Prognosis in Patients with Hepatocellular Carcinoma Based on Molecular Subtypes of Immune Genes
Source: Hindawi journal article supplement (doi:10.1155/2022/2746156), 2022-06-28
Supplement: f3 [file 2746156.f3.pdf]

Gene ID  
SPP1  
S100A2  
NROB1  
PGLYRP4  
OGN  
PAEP  
EPO  
FGF9  
NPPB
