# Supplementary material for: Prediction of Prognosis in Patients with Hepatocellular Carcinoma Based on Molecular Subtypes of Immune Genes
Source: Hindawi journal article supplement (doi:10.1155/2022/2746156), 2022-06-28
Supplement: f4 [file 2746156.f4.pdf]

| id      | coef     | HR       | HR.95L   | HR.95H   | pvalue   |
|---------|----------|----------|----------|----------|----------|
| NROB1   | 0.055905 | 1.057497 | 1.010486 | 1.106695 | 0.015972 |
| PGLYRP4 | 0.062779 | 1.064792 | 0.993673 | 1.141    | 0.075075 |
| OGN     | -0.08149 | 0.921739 | 0.867427 | 0.979453 | 0.008539 |
| EPO     | 0.061897 | 1.063853 | 0.999322 | 1.132551 | 0.052535 |
| FGF9    | 0.06637  | 1.068622 | 0.991314 | 1.151959 | 0.083227 |
